# Supplementary material for: Association of both depressive symptom scores and specific depressive symptoms with all-cause mortality and cardiovascular mortality among participants with chronic kidney disease
Source: Research Square preprint supplement (doi:10.21203/rs.3.rs-5788878/v1), 2025-01-28
Supplement: Supplementary file 1 [file 524a401e07f77563b8f91021.docx]

**Table 4.** Association of depressive symptoms scores with all-cause mortality and cardiovascular mortality stratified by different factors.

| Variables | HR 95%CI | *P* for interaction | Variables | HR 95%CI | *P* for interaction |
| --- | --- | --- | --- | --- | --- |
| Age, years old |  | 0.119 | Age, years old |  | 0.876 |
| ≤65 | 1.049(1.003,1.097) |  | ≤65 | 1.025(0.969, 1.084) |  |
| >65 | 1.025(1.004,1.046) |  | >65 | 1.049(1.019,1.081) |  |
| Sex |  | 0.74 | Sex |  | 0.474 |
| Male | 1.035(1.013,1.058) |  | Male | 1.035(1.000,1.072) |  |
| Female | 1.045(1.011,1.079) |  | Female | 1.063(1.016,1.112) |  |
| Ethnicity |  | 0.356 | Ethnicity |  | 0.207 |
| White | 1.045(1.020,1.071) |  | White | 1.063(1.029,1.099) |  |
| Black | 1.049(1.016,1.082) |  | Black | 1.068(1.012,1.128) |  |
| Mexican | 1.035(0.990,1.081) |  | Mexican | 0.965(0.885, 1.052) |  |
| Other | 1.002(0.945,1.062) |  | Other | 1.027(0.967, 1.090) |  |
| Education level |  | 0.285 | Education level |  | 0.665 |
| <High school diploma | 1.030(1.008,1.053) |  | <High school diploma | 1.037(0.984,1.093) |  |
| High school diploma | 1.037(1.001,1.075) |  | High school diploma | 1.043(0.977,1.115) |  |
| >High school diploma | 1.049(1.007,1.093) |  | >High school diploma | 1.061(1.020,1.103) |  |
| Body mass index, kg/m2 |  | 0.065 | Body mass index, kg/m2 |  | 0.226 |
| ≤30 | 1.064(1.030,1.099) |  | ≤30 | 1.080(1.034,1.128) |  |
| >30 | 1.016(0.992,1.040) |  | >30 | 1.021(0.982,1.061) |  |
| Smoking status |  | 0.851 | Smoking status |  | 0.569 |
| Never | 1.052(1.022,1.082) |  | Never | 1.066(1.019,1.115) |  |
| Former | 1.026(0.987,1.066) |  | Former | 1.023(0.974,1.074) |  |
| Current | 1.046(1.013,1.081) |  | Current | 1.073(1.011, 1.139) |  |
| Drinking status |  | 0.942 | Drinking status |  | 0.154 |
| Never | 1.060(1.018,1.104) |  | Never | 1.081(1.009,1.157) |  |
| Former | 1.032(1.008,1.057) |  | Former | 1.051(1.019,1.084) |  |
| Current | 1.038(1.002,1.075) |  | Current | 1.016(0.963,1.071) |  |
| Diabetes |  | 0.138 | Diabetes |  | 0.245 |
| No | 1.060(1.029,1.092) |  | No | 1.085(1.036,1.137) |  |
| Yes | 1.021(0.998,1.045) |  | Yes | 1.026(0.995,1.059) |  |
| Hypertension |  | 0.322 | Hypertension |  | 0.686 |
| No | 1.020(0.983,1.058) |  | No | 1.033(0.962,1.109) |  |
| Yes | 1.044(1.020,1.069) |  | Yes | 1.053(1.019,1.088) |  |
| Hyperlipidemia |  | 0.607 | Hyperlipidemia |  | 0.828 |
| No | 1.050(1.008,1.093) |  | No | 1.060(0.998,1.127) |  |
| Yes | 1.040(1.018,1.062) |  | Yes | 1.053(1.022,1.084) |  |

Model were all adjusted for age, sex, ethnicity, poverty, education level, smoking status, drinking status, body mass index, systolic blood pressure, diabetes, hyperlipidemia, and hypertension.

Depressive symptoms scores were measured by the nine-item center for the Patient Health Questionnaire (PHQ-9), and the range of PHQ-9 is between 0 and 27 with the highest score indicating the highest risk of depressive symptoms.

Abbreviation: HR, hazard ratio; CI, confidence interval.
