# Supplementary material for: Association of both depressive symptom scores and specific depressive symptoms with all-cause mortality and cardiovascular mortality among participants with chronic kidney disease
Source: Research Square preprint supplement (doi:10.21203/rs.3.rs-5788878/v1), 2025-01-28
Supplement: Supplementary file 2 [file 5b2b1547890495606585d307.docx]

**Table 2.** Association of depressive symptom scores with all-cause mortality and cardiovascular mortality.

| **Model** | Crude model | | Model 1 | | Model 2 | |
| --- | --- | --- | --- | --- | --- | --- |
| HR 95%CI | *P*-value | HR 95%CI | *P*-value | HR 95%CI | *P*-value |
| **All-cause mortality** | |  |  |  |  |  |
| Depressive symptom scores | 1.024(1.004,1.045) | 0.020 | 1.060(1.041,1.079) | <0.001 | 1.040(1.020,1.060) | <0.001 |
| Tertiles of depressive symptom scores | |  |  |  |  |  |
| Q1 | Ref. |  | Ref. |  | Ref. |  |
| Q2 | 0.861(0.700,1.058) | 0.155 | 1.014(0.844,1.217) | 0.885 | 1.021(0.851,1.224) | 0.826 |
| Q3 | 1.287(1.027,1.614) | 0.028 | 1.670(1.367,2.041) | <0.001 | 1.418(1.144,1.759) | 0.001 |
| **Cardiovascular mortality** | |  |  |  |  |  |
| Depressive symptom scores | 1.024(1.001,1.048) | 0.041 | 1.072(1.047,1.098) | <0.001 | 1.054(1.027,1.081) | <0.001 |
| Tertiles of depressive symptom scores | |  |  |  |  |  |
| Q1 | Ref. |  | Ref. |  | Ref. |  |
| Q2 | 0.892(0.688,1.156) | 0.388 | 1.076(0.834,1.389) | 0.571 | 1.134(0.875,1.469) | 0.343 |
| Q3 | 1.325(1.025,1.714) | 0.032 | 1.823(1.428,2.328) | <0.001 | 1.613(1.244,2.091) | <0.001 |

Crude model: No variables were adjusted.

Model 1: Age, sex, and ethnicity were adjusted.

Model 2: Age, sex, ethnicity, poverty, education level, smoking status, drinking status, body mass index, systolic blood pressure, diabetes, hyperlipidemia, and hypertension were adjusted.

Depressive symptom scores were measured by the PHQ-9, and the range of PHQ-9 is between 0 and 27 with the highest score indicating the highest risk of depressive symptoms.

Abbreviation: HR, hazard ratio; CI, confidence interval.
