# Supplementary material for: Association of both depressive symptom scores and specific depressive symptoms with all-cause mortality and cardiovascular mortality among participants with chronic kidney disease
Source: Research Square preprint supplement (doi:10.21203/rs.3.rs-5788878/v1), 2025-01-28
Supplement: Supplementary file 3 [file 99fd8f78259af4a9f8b04584.docx]

**Table 3.** Association of specific depressive symptoms with incidence of all-cause mortality and cardiovascular mortality.

| Variables | All-cause mortality | | Cardiovascular mortality | |
| --- | --- | --- | --- | --- |
| HR 95%CI | *P*-value | HR 95%CI | *P*-value |
| Have little interest in doing things | 1.257(1.137,1.389) | <0.001 | 1.226(1.060,1.418) | 0.006 |
| Feeling down, depressed, or hopeless | 1.131(1.015,1.261) | 0.026 | 1.278(1.085,1.504) | 0.003 |
| Trouble sleeping or sleeping too much | 1.037(0.960,1.119) | 0.358 | 1.088(0.980,1.208) | 0.114 |
| Feeling tired or having little energy | 1.251(1.149,1.362) | <0.001 | 1.357(1.208,1.525) | <0.001 |
| Poor appetite or overeating | 1.129(1.033,1.234) | 0.007 | 1.154(0.973,1.369) | 0.100 |
| Feeling bad about yourself | 1.020(0.902,1.153) | 0.757 | 0.983(0.825,1.171) | 0.849 |
| Trouble concentrating on things | 1.102(0.983,1.236) | 0.096 | 1.149(0.980,1.346) | 0.086 |
| Moving or speaking slowly or too fast | 1.174(1.018,1.353) | 0.027 | 1.202(0.963,1.499) | 0.103 |
| Thought you would be better off dead | 1.411(1.064,1.870) | 0.017 | 1.333(0.939,1.893) | 0.107 |

Specific depressive symptoms were assessed by the nine-item center for the Patient Health Questionnaire (PHQ-9).

Model were all adjusted for age, sex, ethnicity, poverty, education level, smoking status, drinking status, body mass index, systolic blood pressure, diabetes, hyperlipidemia, and hypertension.

Abbreviation: HR, hazard ratio; CI, confidence interval.
