# Supplementary material for: Association of both depressive symptom scores and specific depressive symptoms with all-cause mortality and cardiovascular mortality among participants with chronic kidney disease
Source: Research Square preprint supplement (doi:10.21203/rs.3.rs-5788878/v1), 2025-01-28
Supplement: Supplementary file 4 [file e750878da75111bed8d5f237.docx]

**Table 1.** Baseline characteristics according to tertiles of depressive symptom scores.

| **Variable** | Total (n=2981) | Depressive symptom scores | | | *P*-value |
| --- | --- | --- | --- | --- | --- |
| **Q1 (n=1349)** | **Q2 (n=785)** | **Q3 (n=847)** |
| **Age, years** | 62.14 ± 16.67 | 63.64 ± 16.83 | 62.05 ± 16.56 | 59.84 ± 16.27 | **<0.001** |
| **Sex, n (%)** |  |  |  |  | **<0.001** |
| Female | 1550(52.00) | 593(43.96) | 449(57.20) | 508(59.98) |  |
| Male | 1431(48.00) | 756(56.04) | 336(42.80) | 339(40.02) |  |
| **Ethnicity, n (%)** |  |  |  |  | 0.11 |
| Black | 672(22.54) | 316(23.42) | 151(19.24) | 205(24.20) |  |
| Mexican | 363(12.18) | 159(11.79) | 90(11.46) | 114(13.46) |  |
| Other | 447(14.99) | 197(14.60) | 124(15.80) | 126(14.88) |  |
| White | 1499(50.29) | 677(50.19) | 420(53.50) | 402(47.46) |  |
| **Poverty** | 2.31 ± 1.53 | 2.54 ± 1.58 | 2.38 ± 1.51 | 1.87 ± 1.38 | **<0.001** |
| **Education, n (%)** |  |  |  |  | **<0.001** |
| <High school diploma | 928(31.13) | 389(28.84) | 216(27.52) | 323(38.13) |  |
| High school diploma | 731(24.52) | 329(24.39) | 193(24.59) | 209(24.68) |  |
| >High school diploma | 1322(44.35) | 631(46.78) | 376(47.90) | 315(37.19) |  |
| **Smoke status, n (%)** |  |  |  |  | **<0.001** |
| Former | 975(32.71) | 463(34.32) | 255(32.48) | 257(30.34) |  |
| Never | 1467(49.21) | 695(51.52) | 407(51.85) | 365(43.09) |  |
| Now | 539(18.08) | 191(14.16) | 123(15.67) | 225(26.56) |  |
| **Smoke status, n (%)** |  |  |  |  | **0.01** |
| Former | 834(27.98) | 354(26.24) | 213(27.13) | 267(31.52) |  |
| Never | 500(16.77) | 249(18.46) | 114(14.52) | 137(16.17) |  |
| Now | 1647(55.25) | 746(55.30) | 458(58.34) | 443(52.30) |  |
| **Body mass index, kg/m2** | 29.97 ± 7.02 | 29.11 ± 6.21 | 29.77 ± 6.95 | 31.53 ± 7.97 | **<0.001** |
| **Waist, cm** | 103.52 ± 16.80 | 101.89 ± 15.55 | 102.96 ± 16.59 | 106.64 ± 18.42 | **<0.001** |
| **Blood pressure, mmHg** |  |  |  |  |  |
| **Systolic** | 132.42 ± 22.35 | 132.12 ± 21.78 | 132.08 ± 22.05 | 133.21 ± 23.50 | 0.47 |
| **Diastolic** | 68.84 ± 14.34 | 68.14 ± 14.42 | 68.97 ± 13.89 | 69.83 ± 14.57 | **0.02** |
| **Diabetes, n (%)** |  |  |  |  | **<0.001** |
| No | 1787(59.95) | 860(63.75) | 493(62.80) | 434(51.24) |  |
| Yes | 1194(40.05) | 489(36.25) | 292(37.20) | 413(48.76) |  |
| **Hyperlipidemia, n (%)** | |  |  |  | 0.12 |
| No | 545(18.28) | 266(19.72) | 141(17.96) | 138(16.29) |  |
| Yes | 2436(81.72) | 1083(80.28) | 644(82.04) | 709(83.71) |  |
| **Hypertension, n (%)** | |  |  |  | **0.02** |
| No | 858(28.78) | 422(31.28) | 212(27.01) | 224(26.45) |  |
| Yes | 2123(71.22) | 927(68.72) | 573(72.99) | 623(73.55) |  |
