# Supplementary material for: Association of both depressive symptom scores and specific depressive symptoms with all-cause mortality and cardiovascular mortality among participants with chronic kidney disease
Source: Research Square preprint supplement (doi:10.21203/rs.3.rs-5788878/v1), 2025-01-28
Supplement: Supplementary file 5 [file ef91ef22e84de1491e942e9b.docx]

**Table S1.** Sensitivity analysis of the association of depressive symptom scores with all-cause and CVD mortality in a subgroup of 2841 participants.

| Outcome | Model | *P*-value |
| --- | --- | --- |
| HR 95%CI |
| All-cause mortality |  |  |
| Depressive scores | 1.030(1.010,1.051) | 0.004 |
| Tertiles of depressive scores |  |  |
| Q1 | Ref. |  |
| Q2 | 1.038(0.864,1.248) | 0.690 |
| Q3 | 1.326(1.039,1.692) | 0.023 |
| Cardiovascular mortality |  |  |
| Depressive scores | 1.046(1.014,1.078) | 0.004 |
| Tertiles of depressive scores |  |  |
| Q1 | Ref. |  |
| Q2 | 1.131(0.874,1.463) | 0.349 |
| Q3 | 1.499(1.103,2.037) | 0.010 |

Specific depressive symptoms were assessed by the nine-item center for the Patient Health Questionnaire (PHQ-9).

Model were all adjusted for age, sex, ethnicity, poverty, education level, smoking status, drinking status, body mass index, systolic blood pressure, diabetes, hyperlipidemia, and hypertension.

Abbreviation: HR, hazard ratio; CI, confidence interval.

**Table S2.** Sensitivity analysis of the association of specific depressive symptoms with all-cause and CVD mortality in a subgroup of 2841 participants.

| Variables | All-cause mortality | | Cardiovascular mortality | |
| --- | --- | --- | --- | --- |
| HR 95%CI | *P*-value | HR 95%CI | *P*-value |
| Have little interest in doing things | 1.223(1.091,1.370) | <0.001 | 1.196(1.013,1.412) | 0.035 |
| Feeling down, depressed, or hopeless | 1.089(0.963,1.231) | 0.176 | 1.240(1.021,1.506) | 0.030 |
| Trouble sleeping or sleeping too much | 1.022(0.935,1.116) | 0.633 | 1.065(0.949,1.196) | 0.283 |
| Feeling tired or having little energy | 1.221(1.117,1.334) | <0.001 | 1.312(1.143,1.505) | <0.001 |
| Poor appetite or overeating | 1.088(0.975,1.213) | 0.132 | 1.138(0.945,1.370) | 0.172 |
| Feeling bad about yourself | 0.961(0.849,1.089) | 0.535 | 0.927(0.762,1.129) | 0.452 |
| Trouble concentrating on things | 1.077(0.952,1.218) | 0.239 | 1.155(0.964,1.384) | 0.118 |
| Moving or speaking slowly or too fast | 1.138(1.000,1.294) | 0.050 | 1.221(0.962,1.551) | 0.100 |
| Thought you would be better off dead | 1.010(0.821,1.242) | 0.926 | 1.037(0.740,1.454) | 0.832 |

Specific depressive symptoms were assessed by the nine-item center for the Patient Health Questionnaire (PHQ-9).

Model were all adjusted for age, sex, ethnicity, poverty, education level, smoking status, drinking status, body mass index, systolic blood pressure, diabetes, hyperlipidemia, and hypertension.

Abbreviation: HR, hazard ratio; CI, confidence interval.
